# Supplementary material for: Haemorrhagic Transformation after Ischaemic Stroke in Patients Taking Non-vitamin K Antagonist Oral Anticoagulants
Source: PubMed Central journal article supplement — J Stroke. 2017 Jan 31;19(1):67–76. doi: 10.5853/jos.2016.00542 (PMC5307942; doi:10.5853/jos.2016.00542), 2017-01-31
Supplement: jos-2016-00542-supple1.pdf [file jos-2016-00542-supple1.pdf]

**Supplementary Table 1.** Clinical characteristics and outcome of patients with and without recanalisation therapy (only patients with available follow-up imaging)

|                                             | Patients without recanalization therapy (N = 129) | Patients with recanalization therapy (N = 32) | P value |
|---------------------------------------------|---------------------------------------------------|-----------------------------------------------|---------|
| Age (year)                                  | 77.0 (± 7.9)                                      | 75.7 (± 11.7)                                 | 0.54    |
| Women                                       | 64 (49.6)                                         | 17 (53.1)                                     | 0.84    |
| NOAC                                        |                                                   |                                               | 0.78    |
| Apixaban                                    | 20 (15.5)                                         | 5 (15.6)                                      |         |
| Dabigatran                                  | 36 (27.9)                                         | 7 (21.9)                                      |         |
| Rivaroxaban                                 | 73 (56.6)                                         | 20 (62.5)                                     |         |
| Concomitant platelet inhibition             | 13 (10.1)                                         | 3 (9.4)                                       | > 0.99  |
| CHA <sub>2</sub> DS <sub>2</sub> VASc score | 5 (3–6)                                           | 4 (3–5)                                       | 0.02    |
| HAS-BLED score                              | 4 (3–4)                                           | 3 (3–3)                                       | < 0.001 |
| Medical history                             |                                                   |                                               |         |
| Ischemic stroke/TIA                         | 60 (46.5)                                         | 6 (18.8)                                      | 0.005   |
| Intracranial haemorrhage                    | 3 (2.3)                                           | 0 (0)                                         | > 0.99  |
| Atrial fibrillation                         | 119 (92.2)                                        | 26 (81.3)                                     | 0.09    |
| Hypertension                                | 106 (82.2)                                        | 26 (81.3)                                     | > 0.99  |
| Hyperlipidemia                              | 47 (36.4)                                         | 7 (21.9)                                      | 0.15    |
| Diabetes mellitus                           | 44 (34.1)                                         | 4 (12.5)                                      | 0.02    |
| Heart failure                               | 34 (26.4)                                         | 10 (31.3)                                     | 0.66    |
| Peripheral vascular disease                 | 9 (7.0)                                           | 1 (3.1)                                       | 0.69    |
| Renal function                              |                                                   |                                               |         |
| GFR < 60 mL/min                             | 53 (41.1)                                         | 10 (31.3)                                     | 0.30    |
| Creatinin level (mg/dL)                     | 1.01 (0.87–1.30)                                  | 0.9 (0.79–1.08)                               | 0.02    |
| NIHSS at admission                          | 4 (2–7)                                           | 19 (14–22)                                    | < 0.001 |
| Modified Rankin scale score                 |                                                   |                                               |         |
| Pre stroke                                  | 1 (0–2)                                           | 1 (0–2)                                       | 0.24    |
| At admission                                | 3 (1–4)                                           | 5 (5–5)                                       | < 0.001 |
| At discharge                                | 2 (1–4)                                           | 4 (3–5)                                       | < 0.001 |
| At 3-months*                                | 2 (1–4)                                           | 4 (3–6)                                       | < 0.001 |
| mRS 0–2 at 3 months                         | 66 (51.2)                                         | 5 (15.6)                                      | < 0.001 |
| In-hospital mortality                       | 4 (3.1)                                           | 3 (9.4)                                       | 0.14    |
| Time since last intake NOAC (hour)          | 9 (4–18)                                          | 10 (5–24)                                     | 0.45    |
| Admission imaging                           |                                                   |                                               |         |
| ASPECTS                                     | 10 (9–10)                                         | 8 (7–10)                                      | < 0.001 |
| Haemorrhagic transformation                 |                                                   |                                               | 0.54    |
| HI1                                         | 2                                                 | 0                                             |         |
| HI2                                         | 3                                                 | 0                                             |         |
| PH1                                         | 0                                                 | 0                                             |         |
| PH2                                         | 0                                                 | 0                                             |         |
| PHr1/PHr2                                   | 0/0                                               | 0/0                                           |         |
| Other haemorrhage                           |                                                   |                                               | -       |
| SAH                                         | 0                                                 | 0                                             |         |
| IVH                                         | 0                                                 | 0                                             |         |
| sICH                                        | 0                                                 | 0                                             | -       |
| Follow-up imaging until day 7               |                                                   |                                               |         |
| ASPECTS                                     | 9 (8–10)                                          | 6 (3–8)                                       | < 0.001 |
| Infarct size                                |                                                   |                                               | < 0.001 |
| Small/medium                                | 99 (76.7)                                         | 10 (31.3)                                     |         |
| Large anterior/posterior                    | 30 (23.3)                                         | 22 (68.8)                                     |         |
| Haemorrhagic transformation                 | 18 (14.0)                                         | 13 (40.6)                                     | 0.002   |
| Haemorrhagic transformation                 |                                                   |                                               | 0.03    |
| HI1                                         | 10                                                | 5                                             |         |
| HI 2                                        | 2                                                 | 3                                             |         |
| PH1                                         | 0                                                 | 5                                             |         |
| PH2                                         | 1                                                 | 1                                             |         |
| PHr1 / PHr2                                 | 0 / 0                                             | 0 / 0                                         |         |

(Continued to the next page)

**Supplementary Table 1.** Continued from the previous page

|                   | Patients without recanalization therapy (N = 129) | Patients with recanalization therapy (N = 32) | P value |
|-------------------|---------------------------------------------------|-----------------------------------------------|---------|
| Other haemorrhage |                                                   |                                               |         |
| SAH               | 0                                                 | 2                                             | 0.04    |
| IVH               | 0                                                 | 1                                             | -       |
| sICH              | 1                                                 | 1                                             | -       |

Data are mean ( $\pm$ SD), median (IQR) or n (%).

\*3-months modified Rankin data available for n = 117/129 (90.7%, patients without recanalization therapy), and n = 31/32 patients (96.9%, patients with recanalization therapy).
