# Supplementary material for: Haemorrhagic Transformation after Ischaemic Stroke in Patients Taking Non-vitamin K Antagonist Oral Anticoagulants
Source: PubMed Central journal article supplement — J Stroke. 2017 Jan 31;19(1):67–76. doi: 10.5853/jos.2016.00542 (PMC5307942; doi:10.5853/jos.2016.00542), 2017-01-31
Supplement: jos-2016-00542-supple2.pdf [file jos-2016-00542-supple2.pdf]

**Supplementary Table 2.** Baseline clinical and radiological characteristics of patients with and without follow up imaging

|                                             | Patients with FU img. (N = 129) | Patients without FU img. (N = 102) | P value |
|---------------------------------------------|---------------------------------|------------------------------------|---------|
| Age (year)                                  | 77.0 ( $\pm$ 7.9)               | 77.9 ( $\pm$ 9.0)                  | 0.43    |
| Women                                       | 64 (49.6)                       | 44 (43.1)                          | 0.35    |
| NOAC                                        |                                 |                                    | 0.84    |
| Apixaban                                    | 20 (15.5)                       | 16 (15.7)                          |         |
| Dabigatran                                  | 36 (27.9)                       | 26 (25.5)                          |         |
| Rivaroxaban                                 | 73 (56.6)                       | 60 (58.8)                          |         |
| Concomitant platelet inhibition             | 13 (10.1)                       | 11 (10.8)                          | > 0.99  |
| CHA <sub>2</sub> DS <sub>2</sub> VASc score | 5 (3–6)                         | 4.5 (3–6)                          | 0.59    |
| HAS-BLED score                              | 4 (3–4)                         | 4 (3–4)                            | 0.30    |
| Medical history                             |                                 |                                    |         |
| Ischemic stroke/TIA                         | 60 (46.5)                       | 47 (46.1)                          | > 0.99  |
| Intracranial hemorrhage                     | 3 (2.3)                         | 2 (2.0)                            | > 0.99  |
| Atrial fibrillation                         | 119 (92.2)                      | 90 (88.2)                          | 0.37    |
| Hypertension                                | 106 (82.2)                      | 87 (85.3)                          | 0.59    |
| Hyperlipidemia                              | 47 (36.4)                       | 34 (33.3)                          | 0.68    |
| Diabetes mellitus                           | 44 (34.1)                       | 25 (24.5)                          | 0.15    |
| Heart failure                               | 34 (26.4)                       | 19 (18.6)                          | 0.21    |
| Peripheral vascular disease                 | 9 (7.0)                         | 6 (5.9)                            | 0.79    |
| Renal function                              |                                 |                                    | 0.20    |
| GFR < 60 mL/min                             | 53 (41.1)                       | 32 (31.4)                          |         |
| Creatinin level (mg/dL)                     | 1.01 (0.87–1.30)                | 1.02 (0.84–1.28)                   | 0.99    |
| NIHSS at admission                          | 4 (2–7)                         | 3 (2–6)                            | 0.36    |
| Modified Rankin scale score                 |                                 |                                    |         |
| Pre stroke                                  | 1 (0–2)                         | 1 (0–2)                            | 0.09    |
| At admission                                | 3 (1–4)                         | 3 (2–4)                            | 0.87    |
| At discharge                                | 2 (1–4)                         | 2 (2–3)                            | 0.57    |
| At 3-months                                 | 2 (1–4)                         | 3 (1–4)                            | 0.33    |
| mRS 0–2 at 3 months                         | 66 (56.4)                       | 44 (48.9)                          | 0.33    |
| In-hospital mortality                       | 4 (3.1)                         | 2 (2.0)                            | 0.70    |
| Time since last intake NOAC (hour)          | 9 (4.2–18.3)                    | 8.3 (4.5–13.1)                     | 0.35    |
| Baseline ASPECTS                            | 10 (9–10)                       | 10 (9–10)                          | 0.55    |
| Infarct size                                |                                 |                                    | 0.06    |
| Small/medium                                | 99 (76.7)                       | 89 (87.3)                          |         |
| Large anterior/posterior                    | 30 (23.3)                       | 13 (12.7)                          |         |
