# Supplementary material for: Haemorrhagic Transformation after Ischaemic Stroke in Patients Taking Non-vitamin K Antagonist Oral Anticoagulants
Source: PubMed Central journal article supplement — J Stroke. 2017 Jan 31;19(1):67–76. doi: 10.5853/jos.2016.00542 (PMC5307942; doi:10.5853/jos.2016.00542), 2017-01-31
Supplement: jos-2016-00542-supple3.pdf [file jos-2016-00542-supple3.pdf]

**Supplementary Table 3.** Factors associated with unfavourable outcome (mRS 3-6) at 3-months follow up (univariate analysis; follow-up imaging cohort)

|                                              | OR (95 % CI)      | P value |
|----------------------------------------------|-------------------|---------|
| Age (year)                                   | 1.08 (1.02-1.14)  | 0.005   |
| Female sex                                   | 1.58 (0.76-3.30)  | 0.22    |
| Concomitant platelet inhibition              | 1.09 (0.31-3.78)  | 0.90    |
| Medical history                              |                   |         |
| Ischaemic stroke/TIA                         | 1.41 (0.68-2.94)  | 0.36    |
| Atrial fibrillation                          | 0.59 (0.15-2.33)  | 0.46    |
| Hypertension                                 | 4.71 (1.28-17.28) | 0.020   |
| Hyperlipidemia                               | 1.29 (0.60-2.76)  | 0.51    |
| Diabetes mellitus                            | 3.27 (1.48-7.24)  | 0.004   |
| Heart failure                                | 2.04 (0.88-4.73)  | 0.097   |
| Peripheral vascular disease                  | 1.68 (0.43-6.62)  | 0.46    |
| Renal function: GFR < 60 mL/min              | 2.13 (0.98-4.66)  | 0.058   |
| CHA <sub>2</sub> DS <sub>2</sub> VASc score* | 1.57 (1.21-2.03)  | 0.001   |
| HAS-BLED score <sup>†</sup>                  | 1.91 (1.17-3.11)  | 0.010   |
| Modified Rankin scale score <sup>‡</sup>     |                   |         |
| Pre stroke                                   | 2.29 (1.54-3.39)  | < 0.001 |
| At admission                                 | 2.60 (1.85-3.65)  | < 0.001 |
| NIHSS at admission <sup>§</sup>              | 1.29 (1.15-1.45)  | < 0.001 |
| ASPECTS at admission                         | 0.51 (0.34-0.76)  | 0.001   |
| Infarct size                                 |                   |         |
| Small                                        | Ref.              | 0.001   |
| Medium                                       | 1.36 (0.46-3.98)  |         |
| Large anterior or posterior                  | 5.88 (2.26-15.26) |         |
| Time since last intake NOAC                  | 1.00 (0.95-1.05)  | 0.99    |
| Time to first scan since onset <sup>  </sup> | 1.00 (1.00-1.00)  | 0.66    |
| Haemorrhagic transformation                  | 3.08 (1.07-8.88)  | 0.038   |

\*CHA<sub>2</sub>DS<sub>2</sub>VASc score, range 0-9, from low to high risk of ischaemic stroke in atrial fibrillation; <sup>†</sup>HAS-BLED score, range 0-9, from low to high risk of Haemorrhage under oral anticoagulation.; <sup>‡</sup>Modified Rankin scale score, from 0 (no symptoms) to 6 (death); <sup>§</sup>NIHSS, stroke related neurological deficits, from 0 (no symptoms) to 42; <sup>||</sup>Excluding cases with unknown onset.
