# Supplementary material for: Haemorrhagic Transformation after Ischaemic Stroke in Patients Taking Non-vitamin K Antagonist Oral Anticoagulants
Source: PubMed Central journal article supplement — J Stroke. 2017 Jan 31;19(1):67–76. doi: 10.5853/jos.2016.00542 (PMC5307942; doi:10.5853/jos.2016.00542), 2017-01-31
Supplement: jos-2016-00542-supple4.pdf [file jos-2016-00542-supple4.pdf]

**Supplementary Table 4.** Characteristics of Patients from top-recruiting centres versus standard recruiting centres

|                      | Patients from top-recruiting centres | Patients from standard recruiting centres | P value |
|----------------------|--------------------------------------|-------------------------------------------|---------|
| Age (year)           | 76.9 ( $\pm$ 8.9)                    | 77.7 ( $\pm$ 8.7)                         | 0.43    |
| Women                | 73 (48.3)                            | 52 (46.4)                                 | 0.80    |
| Pre-stroke mRS       | 1 (0–2)                              | 1 (0–2)                                   | 0.20    |
| Stroke severity      |                                      |                                           |         |
| NIHSS at admission   | 4 (2–11)                             | 4 (2–7)                                   | 0.15    |
| mRS at admission     | 3 (2–5)                              | 3 (1–4)                                   | 0.10    |
| ASPECTS at admission | 9 (8–10)                             | 10 (9–10)                                 | 0.34    |
| Outcome              |                                      |                                           |         |
| Early HT             | 13 (8.6)                             | 10 (8.9)                                  | .93     |
| mRS 0–2 at 3-months  | 61 (45.9)                            | 54 (51.4)                                 | .39     |

Data are mean ( $\pm$  SD), median (IQR) or n (%).

N = 263, main analysis group (no-RT group) plus patients treated with re-canalisation therapies.
